# Supplementary material for: Transcriptional response of individual Hawaiian Culex quinquefasciatus mosquitoes to the avian malaria parasite Plasmodium relictum
Source: PubMed Central journal article supplement (PMC9422152; doi:10.1186/s12936-022-04271-x), 2022-08-29

GO molecular functions

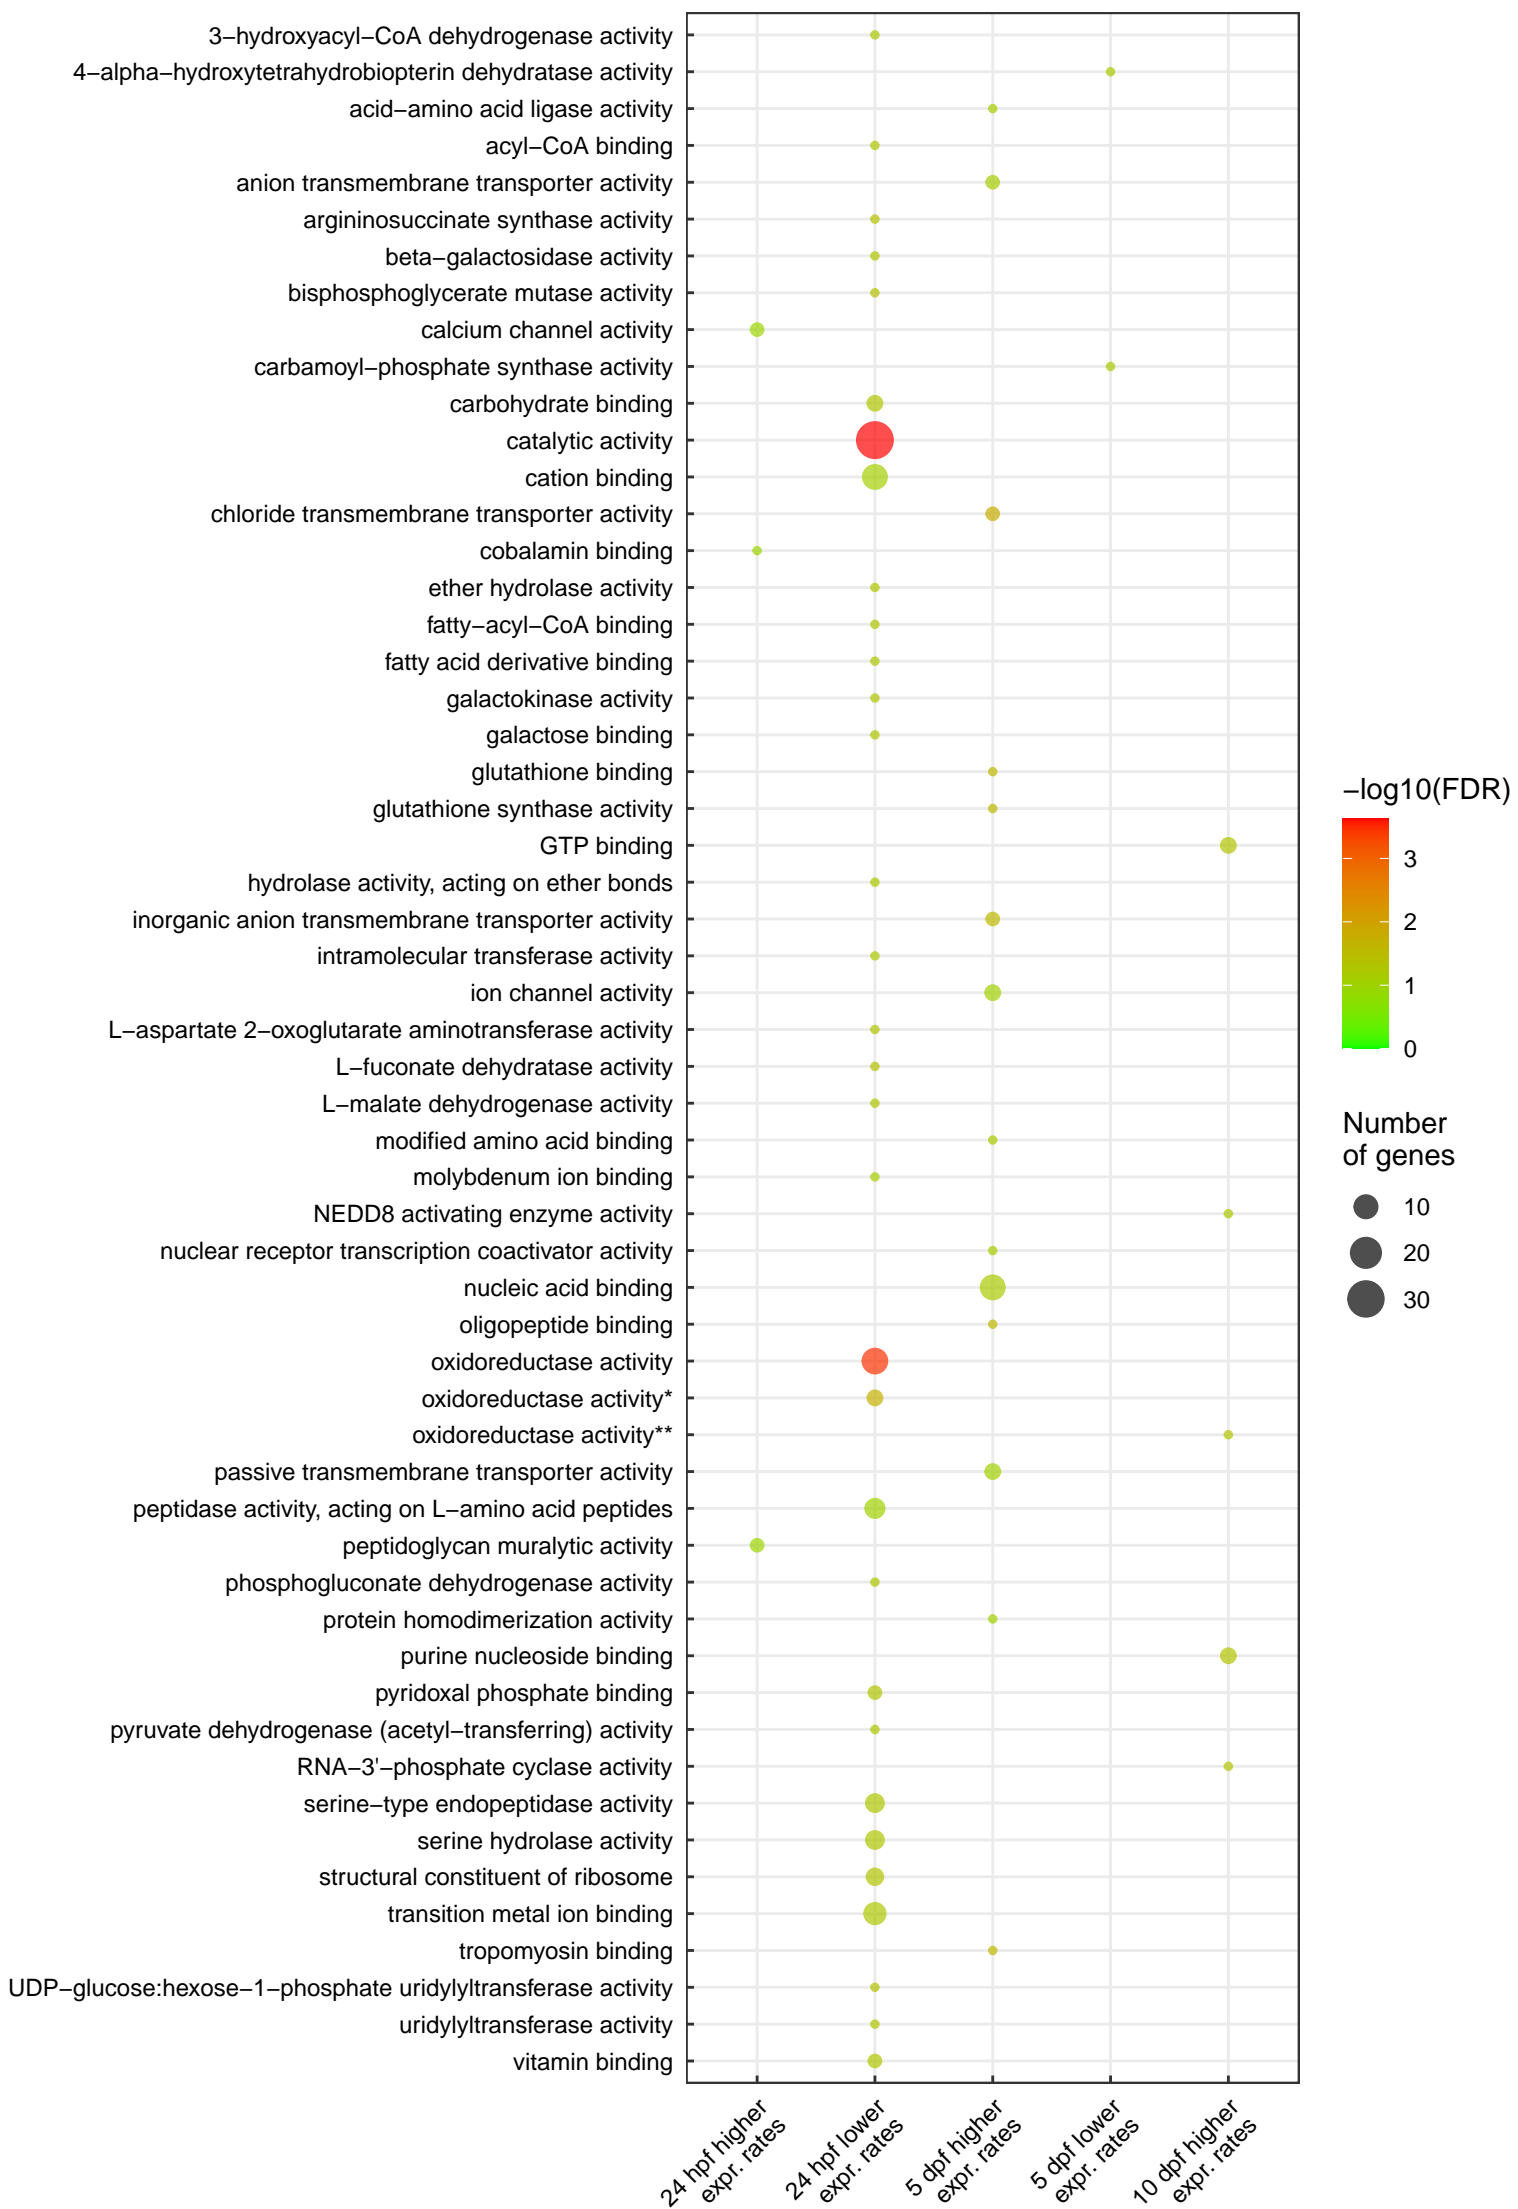

Supplement: 12936_2022_4271_MOESM1_ESM.pdf [file 12936_2022_4271_MOESM1_ESM.pdf]
